# Supplementary material for: Interferon-α-mediated therapeutic resistance in early rheumatoid arthritis implicates epigenetic reprogramming
Source: PubMed Central journal article supplement — Ann Rheum Dis. 2022 Jun 9;81(9):1214–23. doi: 10.1136/annrheumdis-2022-222370 (PMC9380486; doi:10.1136/annrheumdis-2022-222370), 2022-06-09
Supplement: annrheumdis-2022-222370supp002.pdf [file annrheumdis-2022-222370supp002.pdf]

**A**

|                                                       | NEAC Validation cohort |
|-------------------------------------------------------|------------------------|
| Number (n)                                            | 51                     |
| Age, years, median (range)                            | 58 (30-87)             |
| Female, n (%)                                         | 31 (61%)               |
| RF positive, n (%)                                    | 32 (61%)               |
| ACPA positive, n (%)                                  | 35 (67%)               |
| DAS-28-CRP, median                                    | 4.39 (1.38-7.07)       |
| C-reactive protein (mg/L), median (range)             | 8 (4-114)              |
| Erythrocyte sedimentation rate (mm/h), median (range) | 23 (2-68)              |

**B**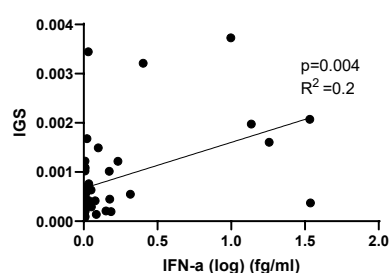**C**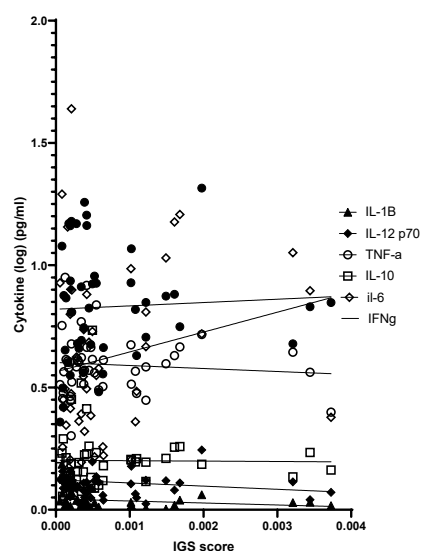**D**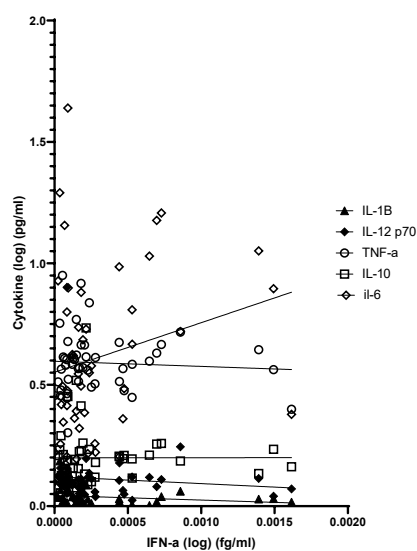**Supplementary file:**

Cohort of early drug naïve RA patients recruited from NEAC with a new diagnosis of RA as per 1987 and 2010 classification criteria. **A** Demographic data for validation cohort shown. **B** Linear regression between circulating IFN- $\alpha$  and whole blood IGS in NEAC validation cohort ( $p=0.004$ ,  $R^2$  0.2,  $n=47$ ). **C** Circulating levels of IFN- $\gamma$  (IFN $\gamma$ ), TNF- $\alpha$  (TNF- $\alpha$ ), IL-6, IL-1 $\beta$  (IL1B), IL-12 p70 and IL-10 were measured

using MSD technology (Meso Scale Discovery) as per manufacturer's instructions. Linear regression between whole blood IGS score and circulating levels cytokines of IFN- $\gamma$  (IFN $\gamma$ ), TNF- $\alpha$  (TNF-a), IL-6, IL-1 $\beta$  (IL1B), IL-12 p70 and IL10 was performed. There was no significant association between any of the cytokines measured and the IGS (p=0.738, p=0.170, p=0.211, p=0.557, and p=0.939 respectively). **D** Circulating levels of IFN- $\alpha$  were measured using Simoa technology (see main methods for details) and linear regression performed between IFN- $\alpha$  and levels of other circulating cytokines, IFN- $\gamma$  (IFN $\gamma$ ), TNF- $\alpha$  (TNF-a), IL-6, IL-1 $\beta$  (IL1B), IL-12 p70 and IL10. Again there was no significant association, p=0.672, p=0.666, p=0.133, p=0.196, p=0.565, p=0.992 respectively.
