# Supplementary material for: Interferon-α-mediated therapeutic resistance in early rheumatoid arthritis implicates epigenetic reprogramming
Source: PubMed Central journal article supplement — Ann Rheum Dis. 2022 Jun 9;81(9):1214–23. doi: 10.1136/annrheumdis-2022-222370 (PMC9380486; doi:10.1136/annrheumdis-2022-222370), 2022-06-09
Supplement: annrheumdis-2022-222370supp003.pdf [file annrheumdis-2022-222370supp003.pdf]

## Supplementary file 2.0:

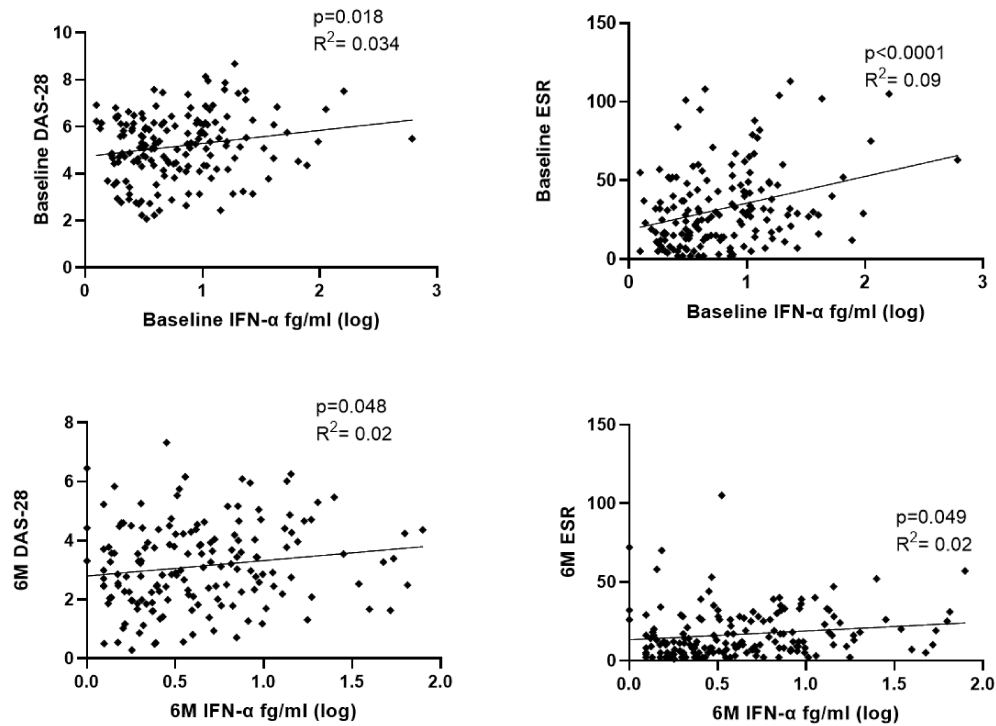Circulating IFN- $\alpha$  and disease activity

Linear regression between baseline IFN- $\alpha$  and baseline DAS-28 and ESR and between 6 month (6M) IFN- $\alpha$  and 6 month DAS-28 and ESR (n=164).
