# Supplementary material for: Interferon-α-mediated therapeutic resistance in early rheumatoid arthritis implicates epigenetic reprogramming
Source: PubMed Central journal article supplement — Ann Rheum Dis. 2022 Jun 9;81(9):1214–23. doi: 10.1136/annrheumdis-2022-222370 (PMC9380486; doi:10.1136/annrheumdis-2022-222370), 2022-06-09
Supplement: annrheumdis-2022-222370supp004.pdf [file annrheumdis-2022-222370supp004.pdf]

## Supplementary file 3.0

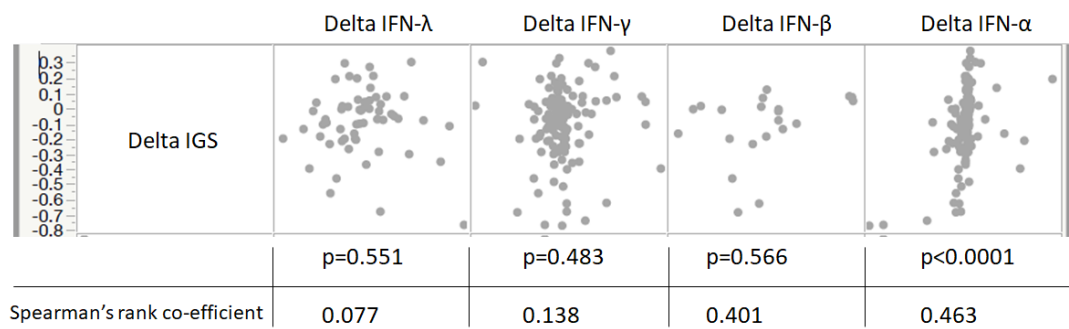**Longitudinal changes in IFNs in reference to the IGS – significant association only seen with IFN-α**

Multivariate analysis for the change (delta) in circulating IFN-α, IFN-β, IFN-γ and IFN-λ between baseline and 6 months in relation to changes in the IGS (delta) between baseline and 6 months. Significant correlations were seen only for changes in IFN-α and changes in the IGS ( $p < 0.0001$ ), spearman's rank correlation co-efficient 0.463.
