# Supplementary material for: Interferon-α-mediated therapeutic resistance in early rheumatoid arthritis implicates epigenetic reprogramming
Source: PubMed Central journal article supplement — Ann Rheum Dis. 2022 Jun 9;81(9):1214–23. doi: 10.1136/annrheumdis-2022-222370 (PMC9380486; doi:10.1136/annrheumdis-2022-222370), 2022-06-09
Supplement: annrheumdis-2022-222370supp005.pdf [file annrheumdis-2022-222370supp005.pdf]

**Supplementary file 4.0****Synovial fluid/Serum IFN-alpha measurement**

## Patient demographics:

5 RA patients had matched synovial fluid and serum measurements of IFN- $\alpha$  performed. Median age 70, range 58-74 with a male:female ratio of 1:4. Three patients were seropositive for both ACPA and RF, one was seronegative and data was unavailable for one patient. Four patients had established RA (disease duration >12 months) and were receiving the following therapies, Adalimumab (n=1), Methotrexate and Sulphasalazine (n=1) and methotrexate and hydroxychloroquine (n=2). One was eRA and sampling taken at time of diagnosis pre initiation of DMARDs.
