# Supplementary material for: Interferon-α-mediated therapeutic resistance in early rheumatoid arthritis implicates epigenetic reprogramming
Source: PubMed Central journal article supplement — Ann Rheum Dis. 2022 Jun 9;81(9):1214–23. doi: 10.1136/annrheumdis-2022-222370 (PMC9380486; doi:10.1136/annrheumdis-2022-222370), 2022-06-09
Supplement: annrheumdis-2022-222370supp006.pdf [file annrheumdis-2022-222370supp006.pdf]

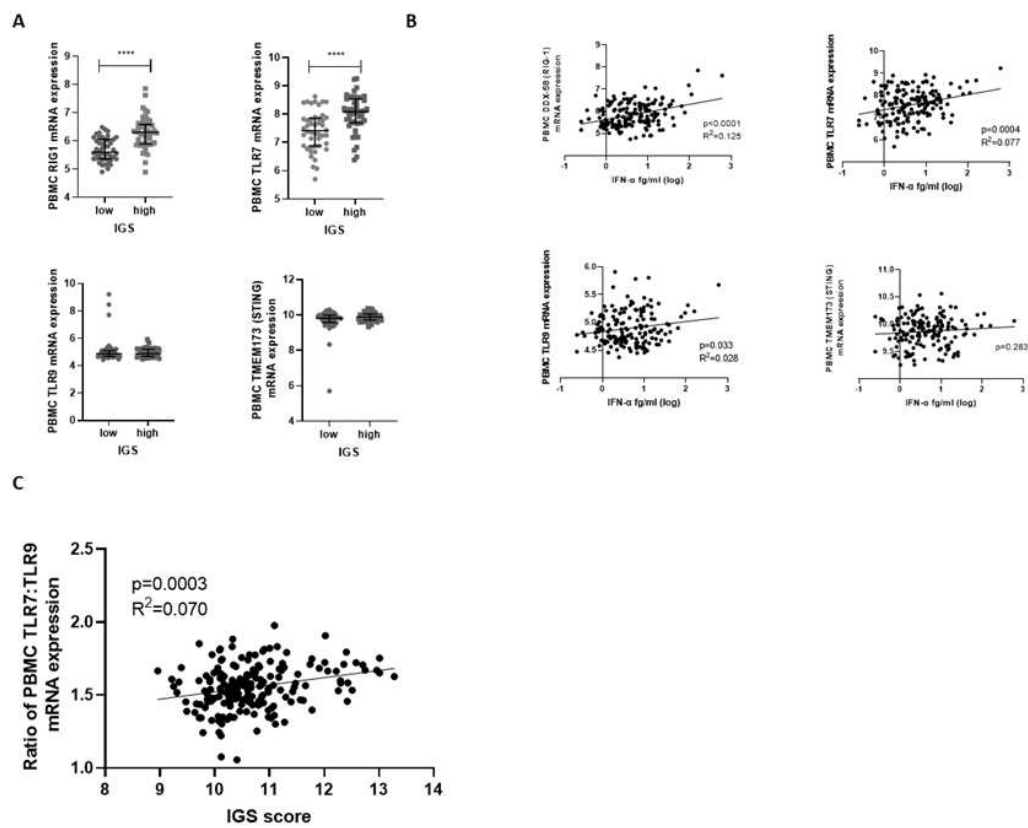

## Supplementary file X.

Expression of cellular receptors and signalling proteins involved with IFN- $\alpha$  signalling were examined in circulating peripheral blood mononuclear cells (PBMCs) of early RA patients. **(A)** Expression of surface and cytosolic viral RNA receptors, TLR7 and RIG-1 (*DDX58*) between IGS high and low early RA patients (n=43 in each group). Median values with interquartile ranges are shown. Mann-Whitney U tests performed. **(B)** Linear regression between circulating IFN- $\alpha$  and TLR7, TLR9 DDX58 (*RIG-1*) and *TMEM173* (*STING*) expression, p and R<sup>2</sup> values depicted in the figure, n=164 **(C)** Linear regression between PBMC ratio of TLR7:TLR9 expression and the whole blood IGS score at baseline in (n=164) eRA patients. p and R<sup>2</sup> values depicted in the figure \*\*\*\* p<0.0001.
