# Supplementary material for: Interferon-α-mediated therapeutic resistance in early rheumatoid arthritis implicates epigenetic reprogramming
Source: PubMed Central journal article supplement — Ann Rheum Dis. 2022 Jun 9;81(9):1214–23. doi: 10.1136/annrheumdis-2022-222370 (PMC9380486; doi:10.1136/annrheumdis-2022-222370), 2022-06-09
Supplement: annrheumdis-2022-222370supp007.pdf [file annrheumdis-2022-222370supp007.pdf]

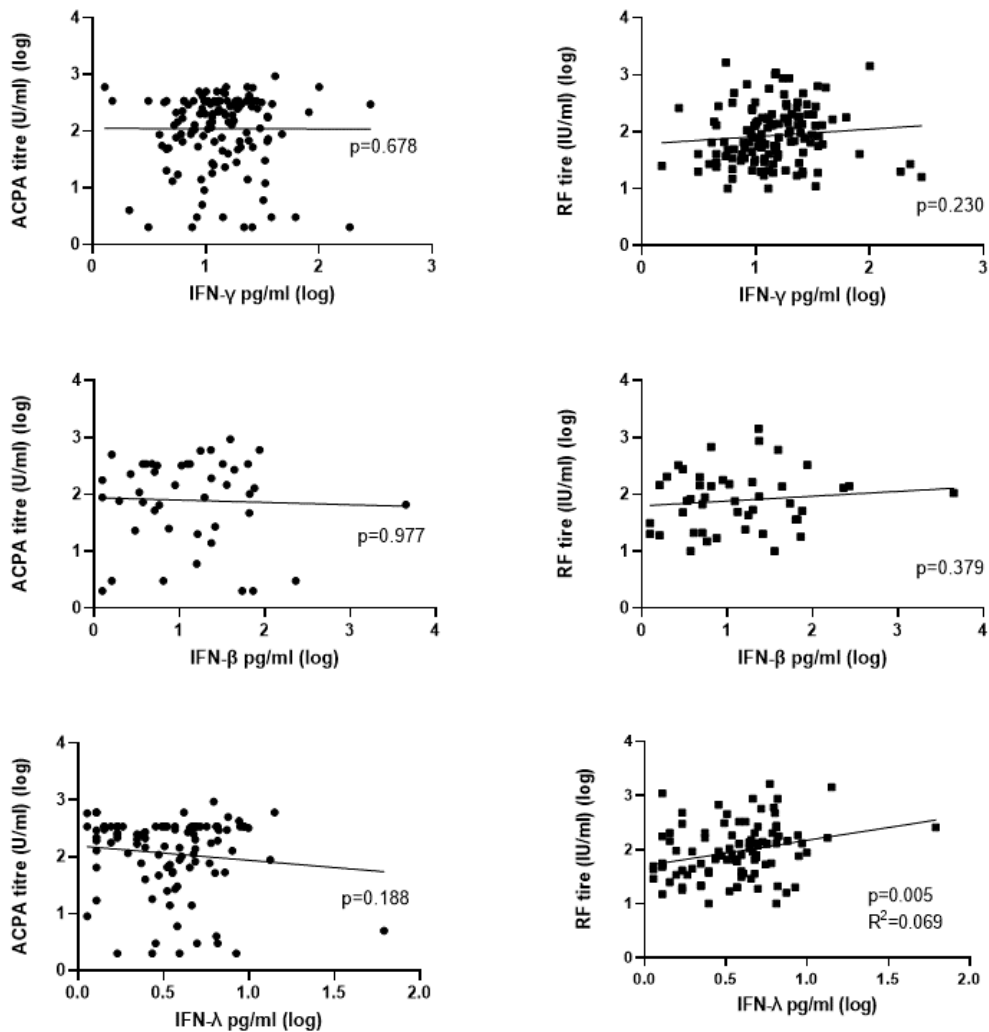**Supplementary file 5.0**

Linear regression comparing circulating IFN- $\beta$  (n=53), IFN- $\gamma$  (n=135) and IFN- $\lambda$  (n=117) with and RF and ACPA titres in seropositive eRA patients.
